# Supplementary material for: Transcriptome Analysis of Orange Head Chinese Cabbage (Brassica rapa L. ssp. pekinensis) and Molecular Marker Development
Source: Int J Genomics. 2017 Apr 2;2017:6835810. doi: 10.1155/2017/6835810 (PMC5392394; doi:10.1155/2017/6835810)
Supplement: Supplementary file 5 [file 6835810.f5.xlsx]

## Sheet: DEGs
					RNA-seq
GeneID	Gene_length	YL-F2-Expression	ORL-F2-Expression	YL-F2-RPKM	ORL-F2-RPKM	log2 Ratio(ORL-F2/YL-F2)	Up-Down-Regulation(ORL-F2/YL-F2)	P-value	FDR	KEGG Orthology	GO Component	GO Function	GO Process	Blast nr
Bra019731	2307	1	19	0.055664	1.12689	4.33946	Up	1.1331e-05	0.000520703	-	GO:0005886//plasma membrane;GO:0005576//extracellular region	-	GO:0009664//plant-type cell wall organization;GO:0019252//starch biosynthetic process;GO:0009832//plant-type cell wall biogenesis;GO:0043085//positive regulation of catalytic activity;GO:0000023//maltose metabolic process	gi|297849572|ref|XP_002892667.1|/1.00625e-54/hypothetical protein ARALYDRAFT_312226 [Arabidopsis lyrata subsp. lyrata]
Bra018525	1197	16	48	1.71652	5.48684	1.67649	Up	1.68327e-05	0.000730867	-	GO:0005737//cytoplasm;GO:0005576//extracellular region	-	GO:0006499//N-terminal protein myristoylation;GO:0006914//autophagy	gi|297814013|ref|XP_002874890.1|/1.52036e-39/hypothetical protein ARALYDRAFT_490272 [Arabidopsis lyrata subsp. lyrata]
Bra020390	1872	29	69	1.98936	5.04334	1.34207	Up	1.14919e-05	0.000527286	K14491|1|0.0|869|aly:ARALYDRAFT_685456|two-component response regulator ARR-B family	GO:0005634//nucleus	GO:0000156//phosphorelay response regulator activity;GO:0003677//DNA binding;GO:0003700//sequence-specific DNA binding transcription factor activity;GO:0003682//chromatin binding	GO:0000160//two-component signal transduction system (phosphorelay);GO:0035556//intracellular signal transduction;GO:0006355//regulation of transcription, DNA-dependent;GO:0006863//purine nucleobase transport;GO:0009736//cytokinin mediated signaling pathway	gi|297796727|ref|XP_002866248.1|/0/predicted protein [Arabidopsis lyrata subsp. lyrata]
Bra035683	1431	41	96	3.67931	9.17924	1.31894	Up	3.16592e-07	2.29883e-05	K15397|1|6e-101|366|aly:ARALYDRAFT_887345|3-ketoacyl-CoA synthase [EC:2.3.1.-]	GO:0005576//extracellular region;GO:0016020//membrane;GO:0005783//endoplasmic reticulum	GO:0016747//transferase activity, transferring acyl groups other than amino-acyl groups	GO:0006633//fatty acid biosynthetic process;GO:0009409//response to cold;GO:0000038//very long-chain fatty acid metabolic process;GO:0042335//cuticle development;GO:0009416//response to light stimulus	gi|15226916|ref|NP_180431.1|/0/3-ketoacyl-CoA synthase 12 [Arabidopsis thaliana]
Bra036841	960	84	196	11.2365	27.9357	1.31392	Up	2.90738e-13	5.1163e-11	-	GO:0005829//cytosol;GO:0005634//nucleus	GO:0004301//epoxide hydrolase activity;GO:0016740//transferase activity	GO:0008152//metabolic process	gi|297819800|ref|XP_002877783.1|/3.90287e-37/hypothetical protein ARALYDRAFT_485452 [Arabidopsis lyrata subsp. lyrata]
Bra030871	1158	34	77	3.77044	9.09823	1.27085	Up	8.78138e-06	0.000415671	-	GO:0009507//chloroplast	-	GO:0009695//jasmonic acid biosynthetic process;GO:0009611//response to wounding	gi|30695908|ref|NP_175924.2|/1.35611e-162/Lipase/lipooxygenase, PLAT/LH2 family protein [Arabidopsis thaliana]
Bra015659	873	91	184	13.386	28.8389	1.1073	Up	6.64938e-10	7.62157e-08	-	GO:0005576//extracellular region;GO:0016023//cytoplasmic membrane-bounded vesicle	-	GO:0051707//response to other organism	gi|15217445|ref|NP_177893.1|/3.13369e-75/pathogenesis-related thaumatin-like protein [Arabidopsis thaliana]
Bra039120	1923	51	103	3.40575	7.3288	1.1056	Up	4.07864e-06	0.000214064	K10529|1|3e-43|174|aly:ARALYDRAFT_317048|alpha-dioxygenase [EC:1.-.-.-]	GO:0005576//extracellular region	GO:0004601//peroxidase activity;GO:0020037//heme binding;GO:0016165//lipoxygenase activity	GO:0015706//nitrate transport;GO:0071446//cellular response to salicylic acid stimulus;GO:0008219//cell death;GO:0042742//defense response to bacterium;GO:0010106//cellular response to iron ion starvation;GO:0009627//systemic acquired resistance;GO:0001561//fatty acid alpha-oxidation;GO:0009737//response to abscisic acid stimulus;GO:0006826//iron ion transport;GO:0010167//response to nitrate;GO:0…	gi|297828604|ref|XP_002882184.1|/4.63851e-42/alpha-dioxygenase 1 [Arabidopsis lyrata subsp. lyrata]
Bra023983	1038	55	110	6.80436	14.5001	1.09153	Up	2.43994e-06	0.000137464	K13424|1|3e-16|84.3|rcu:RCOM_0849600|WRKY transcription factor 33	GO:0005634//nucleus	GO:0042802//identical protein binding;GO:0043565//sequence-specific DNA binding;GO:0003700//sequence-specific DNA binding transcription factor activity	GO:0031348//negative regulation of defense response;GO:0009867//jasmonic acid mediated signaling pathway;GO:0009697//salicylic acid biosynthetic process;GO:0009862//systemic acquired resistance, salicylic acid mediated signaling pathway;GO:0010363//regulation of plant-type hypersensitive response;GO:0010310//regulation of hydrogen peroxide metabolic process;GO:0016045//detection of bacterium;GO:0…	gi|62199610|gb|AAX76840.1|/1.13001e-157/WRKY DNA-binding protein 1 [Brassica rapa subsp. chinensis]
Bra005918	618	49	98	10.1819	21.6976	1.09153	Up	8.70826e-06	0.000412863	K13420|1|1e-18|91.3|pop:POPTR_1075175|LRR receptor-like serine/threonine-protein kinase FLS2 [EC:2.7.11.1]	GO:0005829//cytosol;GO:0009506//plasmodesma;GO:0009505//plant-type cell wall;GO:0005576//extracellular region;GO:0005794//Golgi apparatus	GO:0090353//polygalacturonase inhibitor activity	GO:0010363//regulation of plant-type hypersensitive response;GO:0009862//systemic acquired resistance, salicylic acid mediated signaling pathway;GO:0031348//negative regulation of defense response;GO:0009867//jasmonic acid mediated signaling pathway;GO:0009409//response to cold;GO:0006612//protein targeting to membrane;GO:0043069//negative regulation of programmed cell death;GO:0030968//endoplasm…	gi|343131265|gb|AEL89177.1|/1.54197e-97/polygalacturonase inhibiting protein [Brassica oleracea var. italica]
Bra007924	1146	65	123	7.28368	14.6857	1.01168	Up	2.80326e-06	0.000154159	K14548|1|4e-70|263|rcu:RCOM_0962120|U3 small nucleolar RNA-associated protein 4	GO:0005737//cytoplasm;GO:0005634//nucleus	GO:0080099//L-methionine:2-oxoglutarate aminotransferase activity;GO:0004021//L-alanine:2-oxoglutarate aminotransferase activity;GO:0047312//L-phenylalanine:pyruvate aminotransferase activity;GO:0080098//L-tyrosine:pyruvate aminotransferase activity;GO:0080097//L-tryptophan:pyruvate aminotransferase activity;GO:0050048//L-leucine:2-oxoglutarate aminotransferase activity;GO:0050362//L-tryptophan:2…	GO:0016126//sterol biosynthetic process;GO:0009958//positive gravitropism;GO:0010078//maintenance of root meristem identity;GO:0048825//cotyledon development;GO:0042742//defense response to bacterium;GO:0048467//gynoecium development;GO:0080022//primary root development;GO:0009684//indoleacetic acid biosynthetic process;GO:0009641//shade avoidance;GO:0048366//leaf development;GO:0010087//phloem o…	gi|312283061|dbj|BAJ34396.1|/0/unnamed protein product [Thellungiella halophila]
Bra039047	1506	50	1	4.26351	0.0908552	-5.55233	Down	1.12136e-13	2.03312e-11	K00517|1|2e-81|301|ath:AT4G37370|[EC:1.14.-.-]	GO:0005886//plasma membrane;GO:0005576//extracellular region;GO:0005783//endoplasmic reticulum;GO:0005739//mitochondrion	GO:0009055//electron carrier activity;GO:0004497//monooxygenase activity;GO:0005506//iron ion binding;GO:0020037//heme binding;GO:0016705//oxidoreductase activity, acting on paired donors, with incorporation or reduction of molecular oxygen;GO:0019825//oxygen binding	GO:0010286//heat acclimation;GO:0009723//response to ethylene stimulus;GO:0055114//oxidation-reduction process;GO:0080167//response to karrikin	gi|297818488|ref|XP_002877127.1|/3.47497e-103/cytochrome P450 family protein [Arabidopsis lyrata subsp. lyrata]
Bra031561	1329	51	2	4.92796	0.205911	-4.5809	Down	7.86186e-13	1.34397e-10	K08237|1|8e-33|139|vvi:100246482|hydroquinone glucosyltransferase [EC:2.4.1.218]	-	GO:0080045//quercetin 3'-O-glucosyltransferase activity;GO:0080044//quercetin 7-O-glucosyltransferase activity;GO:0080043//quercetin 3-O-glucosyltransferase activity	GO:0015706//nitrate transport;GO:0010106//cellular response to iron ion starvation;GO:0006826//iron ion transport;GO:0010167//response to nitrate;GO:0048765//root hair cell differentiation;GO:0008152//metabolic process;GO:0009873//ethylene mediated signaling pathway	gi|30680040|ref|NP_563784.2|/3.26283e-86/UDP-glucosyl transferase 71C4 [Arabidopsis thaliana]
Bra029560	1605	80	4	6.40084	0.341004	-4.2304	Down	1.21598e-18	3.30703e-16	K01904|1|0.0|795|aly:ARALYDRAFT_490166|4-coumarate--CoA ligase [EC:6.2.1.12]	GO:0005777//peroxisome	GO:0004321//fatty-acyl-CoA synthase activity;GO:0047077;GO:0016207//4-coumarate-CoA ligase activity	GO:0009851//auxin biosynthetic process;GO:0009695//jasmonic acid biosynthetic process;GO:0055114//oxidation-reduction process	gi|312281669|dbj|BAJ33700.1|/0/unnamed protein product [Thellungiella halophila]
Bra027953	804	59	3	9.42363	0.510552	-4.20615	Down	5.36392e-14	1.00292e-11	-	GO:0005618//cell wall;GO:0009507//chloroplast;GO:0005783//endoplasmic reticulum;GO:0005794//Golgi apparatus	-	GO:0006623//protein targeting to vacuole;GO:0009651//response to salt stress;GO:0009266//response to temperature stimulus;GO:0006972//hyperosmotic response;GO:0006833//water transport;GO:0007030//Golgi organization;GO:0006096//glycolysis;GO:0046686//response to cadmium ion	gi|297852218|ref|XP_002893990.1|/4.1493e-116/cyclase family protein [Arabidopsis lyrata subsp. lyrata]
Bra022161	1353	183	17	17.369	1.7192	-3.33671	Down	2.49006e-34	1.81689e-31	-	GO:0008540//proteasome regulatory particle, base subcomplex;GO:0010169//thioglucosidase complex;GO:0005829//cytosol;GO:0009506//plasmodesma;GO:0005773//vacuole;GO:0005634//nucleus;GO:0009507//chloroplast;GO:0016020//membrane;GO:0005576//extracellular region	GO:0030246//carbohydrate binding;GO:0010180//thioglucosidase binding;GO:0001653//peptide receptor activity	GO:0048767//root hair elongation;GO:0006833//water transport;GO:0010150//leaf senescence;GO:0009853//photorespiration;GO:0007010//cytoskeleton organization;GO:0009407//toxin catabolic process;GO:0019344//cysteine biosynthetic process;GO:0009753//response to jasmonic acid stimulus;GO:0006952//defense response;GO:0010029//regulation of seed germination;GO:0006096//glycolysis;GO:0009651//response to…	gi|30684083|ref|NP_566547.2|/4.96909e-114/myrosinase-binding-like protein [Arabidopsis thaliana]
Bra026843	876	112	13	16.4186	2.03055	-3.01539	Down	1.02158e-19	2.96714e-17	-	GO:0043231//intracellular membrane-bounded organelle	-	-	gi|297851804|ref|XP_002893783.1|/6.6142e-17/predicted protein [Arabidopsis lyrata subsp. lyrata]
Bra001454	1416	216	27	19.589	2.60901	-2.90847	Down	1.77358e-35	1.39627e-32	K01183|1|2e-128|457|ath:AT3G12500|chitinase [EC:3.2.1.14]	GO:0005829//cytosol;GO:0005774//vacuolar membrane;GO:0005576//extracellular region	GO:0008061//chitin binding;GO:0004568//chitinase activity	GO:0015706//nitrate transport;GO:0006032//chitin catabolic process;GO:0016998//cell wall macromolecule catabolic process;GO:0010167//response to nitrate;GO:0009871//jasmonic acid and ethylene-dependent systemic resistance, ethylene mediated signaling pathway;GO:0046686//response to cadmium ion;GO:0050832//defense response to fungus	gi|6048743|gb|AAF02299.1|AF098302_1/4.8393e-168/chitinase [Brassica juncea]
Bra011759	1506	120	17	10.2324	1.54454	-2.7279	Down	4.0847e-19	1.13146e-16	K00517|1|9e-134|475|ath:AT4G37410|[EC:1.14.-.-]	GO:0005576//extracellular region;GO:0005783//endoplasmic reticulum	GO:0016705//oxidoreductase activity, acting on paired donors, with incorporation or reduction of molecular oxygen;GO:0009055//electron carrier activity;GO:0004497//monooxygenase activity;GO:0019825//oxygen binding;GO:0020037//heme binding;GO:0005506//iron ion binding	GO:0071456//cellular response to hypoxia;GO:0055114//oxidation-reduction process;GO:0000041//transition metal ion transport;GO:0052544//defense response by callose deposition in cell wall;GO:0010200//response to chitin;GO:0009682//induced systemic resistance;GO:0009759//indole glucosinolate biosynthetic process;GO:0002213//defense response to insect;GO:0009723//response to ethylene stimulus;GO:00…	gi|147778583|emb|CAN60309.1|/1.26425e-137/hypothetical protein VITISV_015004 [Vitis vinifera]
Bra000129	1365	263	38	24.7426	3.80913	-2.69946	Down	9.44484e-40	8.82974e-37	-	GO:0008540//proteasome regulatory particle, base subcomplex;GO:0005829//cytosol;GO:0009506//plasmodesma;GO:0005773//vacuole;GO:0005634//nucleus;GO:0009507//chloroplast;GO:0016020//membrane	GO:0001653//peptide receptor activity;GO:0005488//binding	GO:0048767//root hair elongation;GO:0006006//glucose metabolic process;GO:0010150//leaf senescence;GO:0019344//cysteine biosynthetic process;GO:0009753//response to jasmonic acid stimulus;GO:0010029//regulation of seed germination;GO:0009651//response to salt stress;GO:0009735//response to cytokinin stimulus;GO:0080129//proteasome core complex assembly;GO:0009737//response to abscisic acid stimul…	gi|297827527|ref|XP_002881646.1|/0/jacalin lectin family protein [Arabidopsis lyrata subsp. lyrata]
Bra016070	957	170	25	22.8118	3.5744	-2.67401	Down	5.77522e-26	2.57868e-23	-	-	-	-	gi|27530934|dbj|BAC54102.1|/2.50508e-52/water-soluble chlorophyll protein [Brassica oleracea var. botrytis]
Bra010598	1506	72	11	6.13945	0.999408	-2.61896	Down	1.55807e-11	2.30748e-09	K00517|1|0.0|825|ath:AT4G37410|[EC:1.14.-.-]	GO:0005576//extracellular region;GO:0005783//endoplasmic reticulum	GO:0016705//oxidoreductase activity, acting on paired donors, with incorporation or reduction of molecular oxygen;GO:0009055//electron carrier activity;GO:0004497//monooxygenase activity;GO:0019825//oxygen binding;GO:0020037//heme binding;GO:0005506//iron ion binding	GO:0071456//cellular response to hypoxia;GO:0055114//oxidation-reduction process;GO:0000041//transition metal ion transport;GO:0052544//defense response by callose deposition in cell wall;GO:0010200//response to chitin;GO:0009682//induced systemic resistance;GO:0009759//indole glucosinolate biosynthetic process;GO:0002213//defense response to insect;GO:0009723//response to ethylene stimulus;GO:00…	gi|15235541|ref|NP_195457.1|/0/cytochrome P450, family 81, subfamily F, polypeptide 4 [Arabidopsis thaliana]
Bra008024	681	198	33	37.3371	6.63043	-2.49343	Down	7.34354e-28	3.60146e-25	-	-	-	-	gi|76150698|gb|ABA39633.1|/4.79231e-109/Kunitz-type cysteine protease inhibitor [Brassica oleracea var. botrytis]
Bra004735	1014	35	6	4.43253	0.809633	-2.45279	Down	7.2583e-06	0.000355383	K01206|1|4e-25|113|ath:AT1G67830|alpha-L-fucosidase [EC:3.2.1.51];K00514|3|4e-22|103|rcu:RCOM_1428040|zeta-carotene desaturase [EC:1.3.5.6]	GO:0005576//extracellular region	GO:0004091//carboxylesterase activity	GO:0006629//lipid metabolic process	gi|42569882|ref|NP_181827.2|/0/GDSL esterase/lipase [Arabidopsis thaliana]
Bra029555	1257	45	8	4.59726	0.870823	-2.40032	Down	4.55446e-07	3.20591e-05	K15014|1|0.0|716|aly:ARALYDRAFT_911781|solute carrier family 29 (equilibrative nucleoside transporter), member 1/2/3	GO:0016021//integral to membrane;GO:0005886//plasma membrane	GO:0005337//nucleoside transmembrane transporter activity	GO:0006863//purine nucleobase transport;GO:0015864//pyrimidine nucleoside transport	gi|297813899|ref|XP_002874833.1|/0/hypothetical protein ARALYDRAFT_911781 [Arabidopsis lyrata subsp. lyrata]
Bra026913	1140	111	20	12.5037	2.40049	-2.38096	Down	1.81995e-15	3.70378e-13	-	-	-	-	gi|297851804|ref|XP_002893783.1|/1.25727e-11/predicted protein [Arabidopsis lyrata subsp. lyrata]
Bra030983	2964	155	30	6.71546	1.3849	-2.27771	Down	4.89846e-20	1.51075e-17	-	GO:0005739//mitochondrion	GO:0004439//phosphatidylinositol-4,5-bisphosphate 5-phosphatase activity	GO:0046855//inositol phosphate dephosphorylation;GO:0032957//inositol trisphosphate metabolic process	gi|297844678|ref|XP_002890220.1|/6.05119e-31/phosphoinositide phosphatase family protein [Arabidopsis lyrata subsp. lyrata]
Bra003142	750	59	12	10.1021	2.18925	-2.20615	Down	3.61624e-08	3.09981e-06	K07213|1|5e-11|66.2|osa:4344925|copper chaperone	GO:0005634//nucleus	GO:0046872//metal ion binding	GO:0030001//metal ion transport	gi|6729504|emb|CAB67660.1|/2.16607e-100/putative protein [Arabidopsis thaliana]
Bra008025	633	607	142	123.142	30.6944	-2.00428	Down	3.4343e-63	4.89241e-60	-	-	-	-	gi|119720792|gb|ABL97966.1|/2.11485e-121/Kunitz-type cysteine protease inhibitor [Brassica rapa]
Bra026845	975	669	159	88.1137	22.3135	-1.98145	Down	1.85127e-68	3.2578e-65	-	-	-	-	gi|297810429|ref|XP_002873098.1|/2.80587e-14/hypothetical protein ARALYDRAFT_349631 [Arabidopsis lyrata subsp. lyrata]
Bra005098	405	49	12	15.5369	4.05416	-1.93822	Down	4.00406e-06	0.000210519	-	GO:0009506//plasmodesma;GO:0005768//endosome;GO:0009505//plant-type cell wall;GO:0005802//trans-Golgi network;GO:0009534//chloroplast thylakoid;GO:0005794//Golgi apparatus;GO:0005886//plasma membrane;GO:0048046//apoplast	GO:0005516//calmodulin binding;GO:0008289//lipid binding;GO:0005319//lipid transporter activity	GO:0006649//phospholipid transfer to membrane;GO:0012501//programmed cell death;GO:0000038//very long-chain fatty acid metabolic process;GO:0042335//cuticle development;GO:0009414//response to water deprivation	gi|3719443|gb|AAC63372.1|/1.96721e-54/lipid transfer protein [Brassica oleracea]
Bra018969	1587	329	85	26.622	7.32853	-1.86102	Down	7.26708e-32	4.83115e-29	K15748|1|2e-42|171|aly:ARALYDRAFT_474364|beta-D-glucopyranosyl abscisate beta-glucosidase [EC:3.2.1.175]	GO:0016020//membrane;GO:0005788//endoplasmic reticulum lumen;GO:0005773//vacuole;GO:0009507//chloroplast;GO:0005576//extracellular region;GO:0005777//peroxisome;GO:0009506//plasmodesma;GO:0010168//ER body;GO:0005634//nucleus	GO:0051993//abscisic acid glucose ester beta-glucosidase activity;GO:0042802//identical protein binding;GO:0043169//cation binding;GO:0016788//hydrolase activity, acting on ester bonds	GO:0009687//abscisic acid metabolic process;GO:0010584//pollen exine formation;GO:0010119//regulation of stomatal movement;GO:0009414//response to water deprivation;GO:0009651//response to salt stress;GO:0050832//defense response to fungus;GO:0009625//response to insect;GO:0019953//sexual reproduction;GO:0030104//water homeostasis;GO:0005975//carbohydrate metabolic process;GO:0051258//protein pol…	gi|297847632|ref|XP_002891697.1|/3.07722e-41/beta-glucosidase 1 [Arabidopsis lyrata subsp. lyrata]
Bra016073	672	663	177	126.697	36.0395	-1.81373	Down	1.88427e-60	2.56226e-57	-	GO:0009507//chloroplast	GO:0004866//endopeptidase inhibitor activity	GO:0010951//negative regulation of endopeptidase activity	gi|16945735|dbj|BAB72020.1|/7.4193e-115/water-soluble chlorophyll protein [Raphanus sativus var. niger]
Bra033148	1116	185	51	21.2877	6.25289	-1.76743	Down	2.0473e-17	4.97943e-15	K01376|1|0.0|661|aly:ARALYDRAFT_911472|[EC:3.4.22.-]	GO:0048046//apoplast;GO:0005773//vacuole;GO:0009507//chloroplast;GO:0005618//cell wall;GO:0005829//cytosol;GO:0009506//plasmodesma;GO:0005783//endoplasmic reticulum	GO:0005515//protein binding;GO:0008234//cysteine-type peptidase activity	GO:0042744//hydrogen peroxide catabolic process;GO:0006833//water transport;GO:0009414//response to water deprivation;GO:0052546//cell wall pectin metabolic process;GO:0009651//response to salt stress;GO:0050832//defense response to fungus;GO:0006972//hyperosmotic response;GO:0007030//Golgi organization;GO:0006096//glycolysis;GO:0015996//chlorophyll catabolic process;GO:0046686//response to cadmi…	gi|297809383|ref|XP_002872575.1|/0/hypothetical protein ARALYDRAFT_911472 [Arabidopsis lyrata subsp. lyrata]
Bra030650	900	53	15	7.56233	2.28047	-1.7295	Down	8.89776e-06	0.000420514	K00507|1|2e-26|117|aly:ARALYDRAFT_887802|stearoyl-CoA desaturase (delta-9 desaturase) [EC:1.14.19.1]	GO:0005739//mitochondrion;GO:0016021//integral to membrane;GO:0005789//endoplasmic reticulum membrane;GO:0005886//plasma membrane	GO:0016717//oxidoreductase activity, acting on paired donors, with oxidation of a pair of donors resulting in the reduction of molecular oxygen to two molecules of water;GO:0009979//16:0 monogalactosyldiacylglycerol desaturase activity;GO:0015238//drug transmembrane transporter activity;GO:0015297//antiporter activity	GO:0031348//negative regulation of defense response;GO:0006855//drug transmembrane transport;GO:0006636//unsaturated fatty acid biosynthetic process;GO:0010205//photoinhibition;GO:0042761//very long-chain fatty acid biosynthetic process;GO:0002213//defense response to insect;GO:0001676//long-chain fatty acid metabolic process;GO:0046685//response to arsenic-containing substance	gi|297848912|ref|XP_002892337.1|/4.48692e-40/fatty acid desaturase family protein [Arabidopsis lyrata subsp. lyrata]
Bra009406	1923	101	29	6.74472	2.06345	-1.7087	Down	9.84634e-10	1.09912e-07	K01051|1|0.0|1109|ath:AT5G04970|pectinesterase [EC:3.1.1.11]	GO:0009505//plant-type cell wall;GO:0005576//extracellular region	GO:0030599//pectinesterase activity;GO:0045330;GO:0004857//enzyme inhibitor activity	GO:0042545//cell wall modification;GO:0043086//negative regulation of catalytic activity;GO:0045490//pectin catabolic process;GO:0016126//sterol biosynthetic process	gi|75309020|sp|Q9FF77.1|PME47_ARATH/0/RecName: Full=Probable pectinesterase/pectinesterase inhibitor 47; Includes: RecName: Full=Pectinesterase inhibitor 47; AltName: Full=Pectin methylesterase inhibitor 47; Includes: RecName: Full=Pectinesterase 47; Short=PE 47; AltName: Full=Pectin methylesterase 47; Short=AtPME47; Flags: Precursor
Bra016072	642	75	24	15.002	5.11507	-1.55233	Down	9.2134e-07	5.94026e-05	-	-	-	-	gi|297839089|ref|XP_002887426.1|/8.64186e-46/hypothetical protein ARALYDRAFT_895079 [Arabidopsis lyrata subsp. lyrata]
Bra026915	900	78	25	11.1295	3.80078	-1.55002	Down	5.70604e-07	3.88843e-05	-	-	-	-	-
Bra037023	1302	62	20	6.11509	2.10181	-1.54074	Down	9.37764e-06	0.00043972	-	-	-	-	gi|297851056|ref|XP_002893409.1|/1.35964e-12/hypothetical protein ARALYDRAFT_890118 [Arabidopsis lyrata subsp. lyrata]
Bra011654	903	99	32	14.0789	4.84883	-1.53783	Down	2.02294e-08	1.81737e-06	-	GO:0005576//extracellular region;GO:0031225//anchored to membrane	-	GO:0051707//response to other organism	gi|297798316|ref|XP_002867042.1|/1.00368e-140/hypothetical protein ARALYDRAFT_912762 [Arabidopsis lyrata subsp. lyrata]
Bra025756	975	336	109	44.2544	15.2967	-1.5326	Down	4.18742e-25	1.73987e-22	K08099|1|1e-163|573|aly:ARALYDRAFT_472193|chlorophyllase [EC:3.1.1.14]	GO:0005773//vacuole;GO:0009507//chloroplast	GO:0047746//chlorophyllase activity	GO:0031348//negative regulation of defense response;GO:0009867//jasmonic acid mediated signaling pathway;GO:0035304//regulation of protein dephosphorylation;GO:0009862//systemic acquired resistance, salicylic acid mediated signaling pathway;GO:0010363//regulation of plant-type hypersensitive response;GO:0010310//regulation of hydrogen peroxide metabolic process;GO:0006355//regulation of transcrip…	gi|24210533|gb|AAN51933.1|AF337544_1/0/chlorophyllase 1 [Brassica oleracea]
Bra037483	492	91	31	23.7519	8.62128	-1.46207	Down	2.22778e-07	1.67033e-05	-	-	-	GO:0080167//response to karrikin	gi|18422923|ref|NP_568700.1|/2.49802e-76/uncharacterized protein [Arabidopsis thaliana]
Bra039945	777	146	50	24.1298	8.80489	-1.45444	Down	5.77628e-11	7.68014e-09	K09841|1|3e-58|223|pop:POPTR_547844|xanthoxin dehydrogenase [EC:1.1.1.288];K13070|3|4e-57|219|osa:4335093|momilactone-A synthase [EC:1.1.1.295]	GO:0005737//cytoplasm;GO:0005576//extracellular region	GO:0016491//oxidoreductase activity;GO:0005507//copper ion binding;GO:0000166//nucleotide binding	GO:0042742//defense response to bacterium;GO:0009688//abscisic acid biosynthetic process;GO:0055114//oxidation-reduction process	gi|15226503|ref|NP_182235.1|/7.60832e-120/Rossmann-fold NAD(P)-binding domain-containing protein [Arabidopsis thaliana]
Bra004057	2676	371	131	17.8037	6.69823	-1.41032	Down	1.53764e-24	6.13335e-22	K00454|1|0.0|1393|aly:ARALYDRAFT_484907|lipoxygenase [EC:1.13.11.12]	GO:0009941//chloroplast envelope;GO:0009570//chloroplast stroma;GO:0009535//chloroplast thylakoid membrane	GO:0005515//protein binding;GO:0005506//iron ion binding;GO:0016165//lipoxygenase activity	GO:0009072//aromatic amino acid family metabolic process;GO:0000096//sulfur amino acid metabolic process;GO:0009611//response to wounding;GO:0016117//carotenoid biosynthetic process;GO:0009620//response to fungus;GO:0006636//unsaturated fatty acid biosynthetic process;GO:0019252//starch biosynthetic process;GO:0044272//sulfur compound biosynthetic process;GO:0030003//cellular cation homeostasis;G…	gi|130845790|gb|ABO32545.1|/0/LOX [Brassica oleracea var. gemmifera]
Bra031132	1272	79	29	7.97558	3.11951	-1.35427	Down	5.34002e-06	0.000270308	K00815|1|2e-87|320|ath:AT5G36160|tyrosine aminotransferase [EC:2.6.1.5]	GO:0005829//cytosol;GO:0009536//plastid	GO:0033855;GO:0080130//L-phenylalanine:2-oxoglutarate aminotransferase activity;GO:0016847//1-aminocyclopropane-1-carboxylate synthase activity;GO:0004838//L-tyrosine:2-oxoglutarate aminotransferase activity;GO:0030170//pyridoxal phosphate binding	GO:0042218//1-aminocyclopropane-1-carboxylate biosynthetic process;GO:0010189//vitamin E biosynthetic process;GO:0006559//L-phenylalanine catabolic process;GO:0006572//tyrosine catabolic process;GO:0006826//iron ion transport	gi|42568147|ref|NP_198465.3|/3.0885e-86/tyrosine aminotransferase [Arabidopsis thaliana]
Bra027605	1152	403	151	44.9236	17.9349	-1.3247	Down	2.95734e-24	1.1641e-21	-	GO:0005794//Golgi apparatus;GO:0016020//membrane	-	-	gi|42573581|ref|NP_974887.1|/4.45885e-174/nodulin MtN21 /EamA-like transporter family protein [Arabidopsis thaliana]
Bra033532	408	106	40	33.3632	13.4145	-1.31446	Down	2.45342e-07	1.82578e-05	-	GO:0031225//anchored to membrane;GO:0044464//cell part	-	GO:0009755//hormone-mediated signaling pathway	gi|297804592|ref|XP_002870180.1|/6.5336e-58/predicted protein [Arabidopsis lyrata subsp. lyrata]
Bra015712	654	431	163	84.6295	34.1024	-1.31129	Down	1.86734e-25	8.2152e-23	-	-	-	-	gi|297821647|ref|XP_002878706.1|/9.31434e-11/hypothetical protein ARALYDRAFT_900876 [Arabidopsis lyrata subsp. lyrata]
Bra024643	1164	146	56	16.1073	6.58279	-1.29094	Down	2.21084e-09	2.31257e-07	K00161|1|2e-112|403|ath:AT1G24180|pyruvate dehydrogenase E1 component subunit alpha [EC:1.2.4.1]	GO:0005829//cytosol;GO:0005739//mitochondrion;GO:0005634//nucleus	GO:0004739//pyruvate dehydrogenase (acetyl-transferring) activity;GO:0008270//zinc ion binding;GO:0050897//cobalt ion binding	GO:0009749//response to glucose stimulus;GO:0009744//response to sucrose stimulus;GO:0009750//response to fructose stimulus;GO:0006098//pentose-phosphate shunt;GO:0009651//response to salt stress;GO:0006096//glycolysis;GO:0046686//response to cadmium ion	gi|15221692|ref|NP_173828.1|/3.1824e-111/pyruvate dehydrogenase E1 component subunit alpha-2 [Arabidopsis thaliana]
Bra033563	795	118	49	19.0606	8.43342	-1.1764	Down	5.87566e-07	3.98586e-05	-	GO:0009505//plant-type cell wall;GO:0005794//Golgi apparatus;GO:0009506//plasmodesma;GO:0005576//extracellular region;GO:0016020//membrane;GO:0005829//cytosol	-	GO:0009828//plant-type cell wall loosening;GO:0009826//unidimensional cell growth;GO:0019953//sexual reproduction	gi|15233841|ref|NP_195553.1|/1.7987e-63/expansin-like A2 [Arabidopsis thaliana]
Bra039555	1317	240	100	23.4017	10.3894	-1.17151	Down	1.10974e-12	1.82411e-10	K13065|1|9e-32|136|osa:4329959|shikimate O-hydroxycinnamoyltransferase [EC:2.3.1.133]	GO:0005737//cytoplasm	GO:0016747//transferase activity, transferring acyl groups other than amino-acyl groups	GO:0000041//transition metal ion transport	gi|297800648|ref|XP_002868208.1|/0/hypothetical protein ARALYDRAFT_915274 [Arabidopsis lyrata subsp. lyrata]
Bra006997	864	590	250	87.6921	39.5914	-1.14726	Down	4.42014e-28	2.24124e-25	K09872|1|2e-157|553|aly:ARALYDRAFT_485715|aquaporin PIP	GO:0005773//vacuole;GO:0016021//integral to membrane;GO:0009507//chloroplast;GO:0009506//plasmodesma;GO:0005886//plasma membrane	GO:0015250//water channel activity;GO:0031625//ubiquitin protein ligase binding	GO:0009750//response to fructose stimulus;GO:0006833//water transport;GO:0080170//hydrogen peroxide transmembrane transport;GO:0006816//calcium ion transport;GO:0010106//cellular response to iron ion starvation;GO:0009651//response to salt stress;GO:0006826//iron ion transport;GO:0048767//root hair elongation;GO:0006972//hyperosmotic response;GO:0007030//Golgi organization;GO:0006096//glycolysis;…	gi|5081421|gb|AAD39373.1|AF118382_1/2.72982e-164/plasma membrane intrinsic protein 1 [Brassica napus]
Bra013724	2454	103	44	5.38995	2.45331	-1.13554	Down	5.77834e-06	0.000288108	-	GO:0016021//integral to membrane;GO:0005770//late endosome;GO:0005634//nucleus	GO:0015385//sodium:hydrogen antiporter activity	GO:0006623//protein targeting to vacuole;GO:0035725//sodium ion transmembrane transport;GO:0010583//response to cyclopentenone;GO:0010260//organ senescence;GO:0009407//toxin catabolic process;GO:0006885//regulation of pH	gi|297799616|ref|XP_002867692.1|/0/ATCHX17 [Arabidopsis lyrata subsp. lyrata]
Bra013833	1221	191	84	20.0881	9.41323	-1.09358	Down	1.92511e-09	2.03504e-07	K01728|1|0.0|801|aly:ARALYDRAFT_492364|pectate lyase [EC:4.2.2.2]	GO:0005576//extracellular region;GO:0016020//membrane	GO:0030570//pectate lyase activity	GO:0006949//syncytium formation	gi|297799520|ref|XP_002867644.1|/0/pectate lyase family protein [Arabidopsis lyrata subsp. lyrata]
Bra013738	354	149	66	54.0512	25.5103	-1.08325	Down	1.45327e-07	1.12632e-05	-	GO:0005634//nucleus	-	GO:0009750//response to fructose stimulus;GO:0009744//response to sucrose stimulus	gi|297803752|ref|XP_002869760.1|/1.71244e-50/hypothetical protein ARALYDRAFT_492480 [Arabidopsis lyrata subsp. lyrata]
Bra035505	240	110	49	58.8577	27.9357	-1.07512	Down	7.28534e-06	0.000356125	-	-	-	GO:0009695//jasmonic acid biosynthetic process;GO:0009753//response to jasmonic acid stimulus;GO:0009611//response to wounding;GO:0010200//response to chitin;GO:0009873//ethylene mediated signaling pathway;GO:0009620//response to fungus	gi|297846270|ref|XP_002891016.1|/7.87931e-27/hypothetical protein ARALYDRAFT_890872 [Arabidopsis lyrata subsp. lyrata]
Bra019846	900	385	173	54.9339	26.3014	-1.06256	Down	7.51862e-17	1.73021e-14	K08235|1|3e-81|300|aly:ARALYDRAFT_471290|xyloglucan:xyloglucosyl transferase [EC:2.4.1.207]	GO:0048046//apoplast;GO:0005618//cell wall	GO:0004553//hydrolase activity, hydrolyzing O-glycosyl compounds;GO:0016762//xyloglucan:xyloglucosyl transferase activity	GO:0006073//cellular glucan metabolic process	gi|18391291|ref|NP_563892.1|/3.37661e-80/xyloglucan:xyloglucosyl transferase [Arabidopsis thaliana]
Bra003792	501	134	62	34.347	16.9328	-1.02036	Down	2.06062e-06	0.00011742	-	-	-	-	-
Bra002328	612	739	346	155.065	77.357	-1.00327	Down	2.78082e-28	1.43433e-25	K01051|1|9e-15|78.2|aly:ARALYDRAFT_892433|pectinesterase [EC:3.1.1.11]	GO:0009507//chloroplast	GO:0030599//pectinesterase activity;GO:0046910//pectinesterase inhibitor activity	GO:0043086//negative regulation of catalytic activity	gi|297812259|ref|XP_002874013.1|/5.73808e-89/hypothetical protein ARALYDRAFT_488983 [Arabidopsis lyrata subsp. lyrata]
Bra040203	1101	143	67	16.679	8.3265	-1.00225	Down	1.34077e-06	8.20254e-05	K00514|1|5e-24|110|rcu:RCOM_1428040|zeta-carotene desaturase [EC:1.3.5.6];K01206|2|2e-20|98.6|ath:AT1G67830|alpha-L-fucosidase [EC:3.2.1.51]	GO:0005576//extracellular region	GO:0004091//carboxylesterase activity	GO:0042538//hyperosmotic salinity response;GO:0006629//lipid metabolic process;GO:0010226//response to lithium ion;GO:0010103//stomatal complex morphogenesis;GO:0009751//response to salicylic acid stimulus	gi|297833112|ref|XP_002884438.1|/0/Li-tolerant lipase 1 [Arabidopsis lyrata subsp. lyrata]
